# Supplementary material for: SNX3 controls Wingless/Wnt secretion through regulating retromer-dependent recycling of Wntless
Source: PubMed Central journal article supplement — Cell Res. 2011 Nov 1;21(12):1677–90. doi: 10.1038/cr.2011.167 (PMC3357989; doi:10.1038/cr.2011.167), 2011-11-01
Supplement: cr2011167x1.pdf [file cr2011167x1.pdf]

## Supplementary information, Figure S1

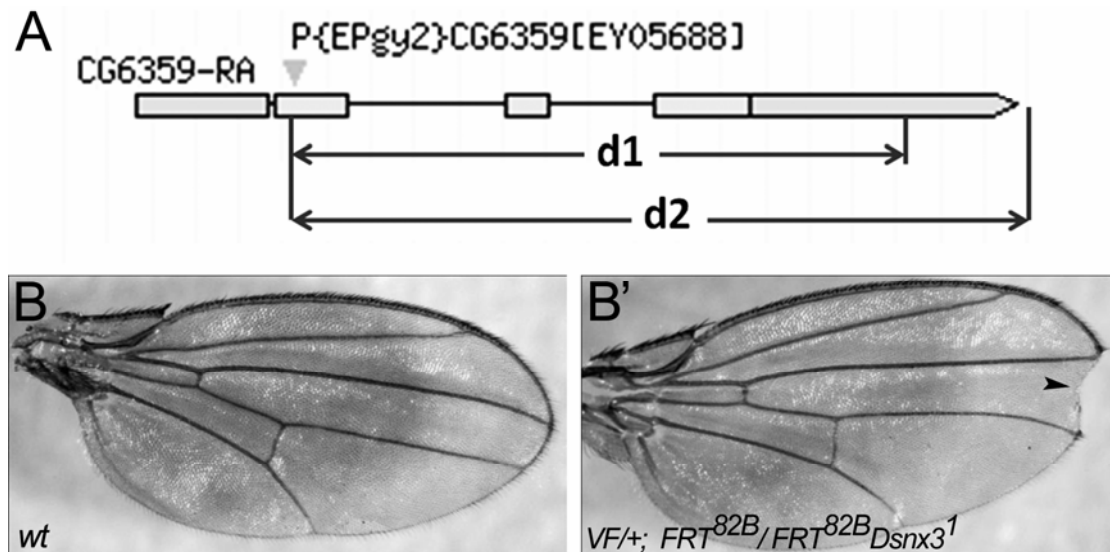

**Figure S1** *Dsnx3* null alleles generation and mosaic clone analysis in developing wings. (A) *Dsnx3* null alleles were screened after mobilization of EY05688 P element and two null alleles, *Dsnx3<sup>1</sup>* and *Dsnx3<sup>2</sup>*, were obtained. *Dsnx3<sup>1</sup>* had 1 398 bp deletion which included the start codon and all three exons. *Dsnx3<sup>2</sup>* deletion is 1 659bp and extended even further into the 3'UTR of the *Dsnx3* gene. (B) We generated mosaic clones mutant for *Dsnx3<sup>1</sup>* in developing wings using the 'direct mosaic system' by *vg Q1206-Gal4 UAS-Flp*, and found obvious notching at the margin region of the wing (arrowhead in B'), *Dsnx3<sup>2</sup>* also have the same wing notching phenotype (data not shown). We selected *Dsnx3<sup>1</sup>* for all subsequent analyses.
