# Supplementary material for: SNX3 controls Wingless/Wnt secretion through regulating retromer-dependent recycling of Wntless
Source: PubMed Central journal article supplement — Cell Res. 2011 Nov 1;21(12):1677–90. doi: 10.1038/cr.2011.167 (PMC3357989; doi:10.1038/cr.2011.167), 2011-11-01
Supplement: cr2011167x2.pdf [file cr2011167x2.pdf]

## Supplementary information, Figure S2

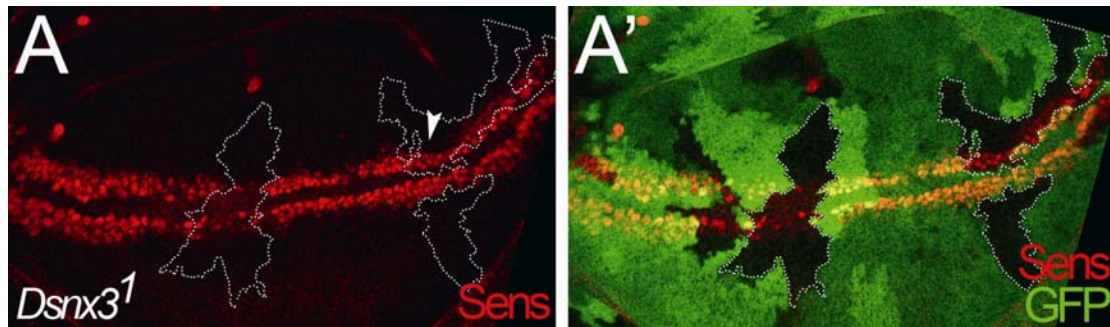

**Figure S2** Sens expression in wing disc bearing *Dsnx3*<sup>1</sup> clones. (A-A') Sens levels were still maintained in *Dsnx3*<sup>1</sup> wing disc clones (marked by the dotted lines and by the absence of GFP in A') when they are adjacent to the wild-type Wg expressing cells (arrowhead in A).
