# Supplementary material for: SNX3 controls Wingless/Wnt secretion through regulating retromer-dependent recycling of Wntless
Source: PubMed Central journal article supplement — Cell Res. 2011 Nov 1;21(12):1677–90. doi: 10.1038/cr.2011.167 (PMC3357989; doi:10.1038/cr.2011.167), 2011-11-01
Supplement: cr2011167x3.pdf [file cr2011167x3.pdf]

## Supplementary information, Figure S3

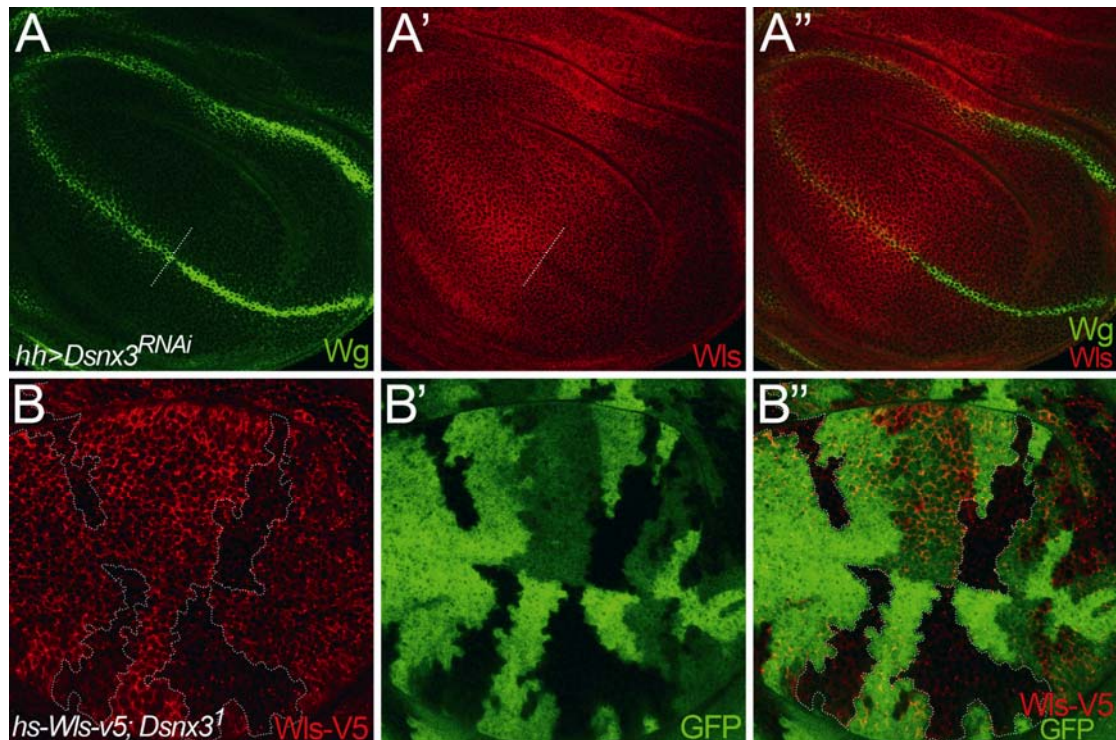

**Figure S3** DSNX3 regulates Wg secretion by controlling Wls stability. (A-A'') *UAS-Dsnx3<sup>RNAi</sup>* was expressed in the entire posterior (P) compartment using *hh<sup>Gal4</sup>*. Wg accumulated in Wg-producing cells of the P compartment, and Wls staining was dramatically reduced in both Wg-secreting cells and in non-Wg-secreting cells (A'). (B-B'') Flies with *Dsnx3<sup>1</sup>* clones carrying the *hs-wls-V5* construct were heat shocked for 1.5 h. 5 h after induction, Wls-V5 protein distribution (red) was examined. Wls-V5 levels were markedly reduced in *Dsnx3<sup>1</sup>* clones outlined by the dotted lines to mark the absence of GFP (B', green).
