# Supplementary material for: SNX3 controls Wingless/Wnt secretion through regulating retromer-dependent recycling of Wntless
Source: PubMed Central journal article supplement — Cell Res. 2011 Nov 1;21(12):1677–90. doi: 10.1038/cr.2011.167 (PMC3357989; doi:10.1038/cr.2011.167), 2011-11-01
Supplement: cr2011167x5.pdf [file cr2011167x5.pdf]

## Supplementary information, Figure S5

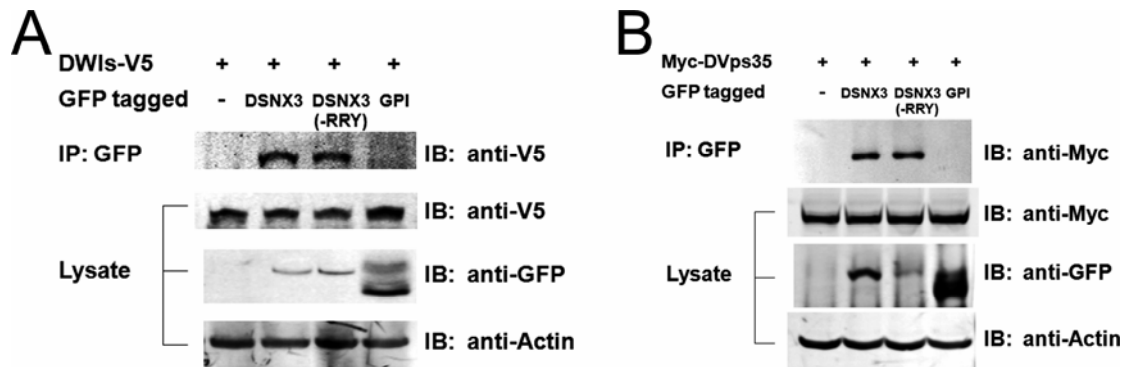

**Figure S5** DSNX3 interacts with Wls and DVps35 independent of the PI3P binding motif of the PX domain. **(A)** *Drosophila* S2 cells were transfected with plasmids to express DWls-V5 with DSNX3-GFP or DSNX3(-RRY)-GFP, separately. Both DSNX3-GFP and DSNX3(-RRY)-GFP can co-precipitate DWls-V5 under the same experimental conditions. The co-precipitation assay of GFP-GPI and DWls-V5 was performed as the negative control. **(B)** HeLa cells were transfected with plasmids to express Myc-DVps35 with DSNX3-GFP or DSNX3(-RRY)-GFP, separately. Both DSNX3-GFP and DSNX3(-RRY)-GFP can co-precipitate Myc-DVps35 under the same experimental conditions. The co-precipitation assay of GFP-GPI and Myc-DVps35 was performed as the negative control.
